# Supplementary material for: Nitric oxide: an old drug but with new horizons in ophthalmology—a narrative review
Source: PubMed Central journal article supplement — Ann Transl Med. 2023 Jun 6;11(10):352. doi: 10.21037/atm-22-5634 (PMC10477639; doi:10.21037/atm-22-5634), 2023-06-06
Supplement: atm-11-10-352-rc.pdf [file atm-11-10-352-rc.pdf]

## Narrative Review Checklist

| Section/Topic             | Item No | Item                                                                                                                                                                               | Reported on Page Number/Line Number                                               | Reported on Section/Paragraph                                                                                                                                                                                                                             |
|---------------------------|---------|------------------------------------------------------------------------------------------------------------------------------------------------------------------------------------|-----------------------------------------------------------------------------------|-----------------------------------------------------------------------------------------------------------------------------------------------------------------------------------------------------------------------------------------------------------|
| <b>TITLE</b>              |         |                                                                                                                                                                                    |                                                                                   |                                                                                                                                                                                                                                                           |
| Title                     | 1       | Identify the report as a Narrative Review or Literature Review.                                                                                                                    | Page 1/ line 1-2                                                                  | Title                                                                                                                                                                                                                                                     |
| <b>ABSTRACT</b>           |         |                                                                                                                                                                                    |                                                                                   |                                                                                                                                                                                                                                                           |
| Structured summary        | 2       | Provide a structured summary with the subsections as: Background and Objective, Methods, Key Content and Findings, Conclusions.                                                    | Page 2,3/ lines 20-50                                                             | Abstract                                                                                                                                                                                                                                                  |
| <b>INTRODUCTION</b>       |         |                                                                                                                                                                                    |                                                                                   |                                                                                                                                                                                                                                                           |
| Rationale/background      | 3       | Describe the rationale for the review in the context of what is already known.                                                                                                     | Page 4/lines 67-72                                                                | Introduction/paragraph 2                                                                                                                                                                                                                                  |
| Objectives                | 4       | Specify the key question(s) identified for the review topic.                                                                                                                       | Page 4/lines 80-82                                                                | Introduction/paragraph 4                                                                                                                                                                                                                                  |
| <b>METHODS</b>            |         |                                                                                                                                                                                    |                                                                                   |                                                                                                                                                                                                                                                           |
| Research selection        | 5       | Specify the process for identifying the literature search (eg, years considered, language, publication status, study design, and databases of coverage).                           | Page 4,5/ lines 84-86                                                             | Methods                                                                                                                                                                                                                                                   |
| <b>DISCUSSION/SUMMARY</b> |         |                                                                                                                                                                                    |                                                                                   |                                                                                                                                                                                                                                                           |
| Narrative                 | 6       | Discuss: 1) research reviewed including fundamental or key findings, 2) limitations and/or quality of research reviewed, and 3) need for future research.                          | 1) Page 5-9/lines90-184<br>2) page 20/ lines 430-439<br>3) page 19/ lines 411-429 | 1) Discussion/<br>Sections: NO biosynthesis,<br>reactive nitrogen species,<br>Biology of NO, pathway of<br>NO signal, NO donors<br>2) Discussion/<br>Section: limitation of the<br>review<br>3) Discussion/<br>Section: Future of NO in<br>ophthalmology, |
| Summary                   | 7       | Provide an overall interpretation of the narrative review in the context of clinical practice for health professionals, policy development and implementation, or future research. | Page 20/lines 440-451                                                             | Conclusions                                                                                                                                                                                                                                               |

Article Information: <https://dx.doi.org/10.21037/atm-22-5634>

\*As the checklist was provided upon initial submission, the page number/line number reported may be changed due to copyediting and may not be referable in the published version. In this case, the section/paragraph may be used as an alternative reference.
